# Supplementary material
Source: Springer Nature journal article supplement (https://www.springermedizin.de/resource/supplementary/12957_2011_940_MOESM1_ESM.pdf/9561656)

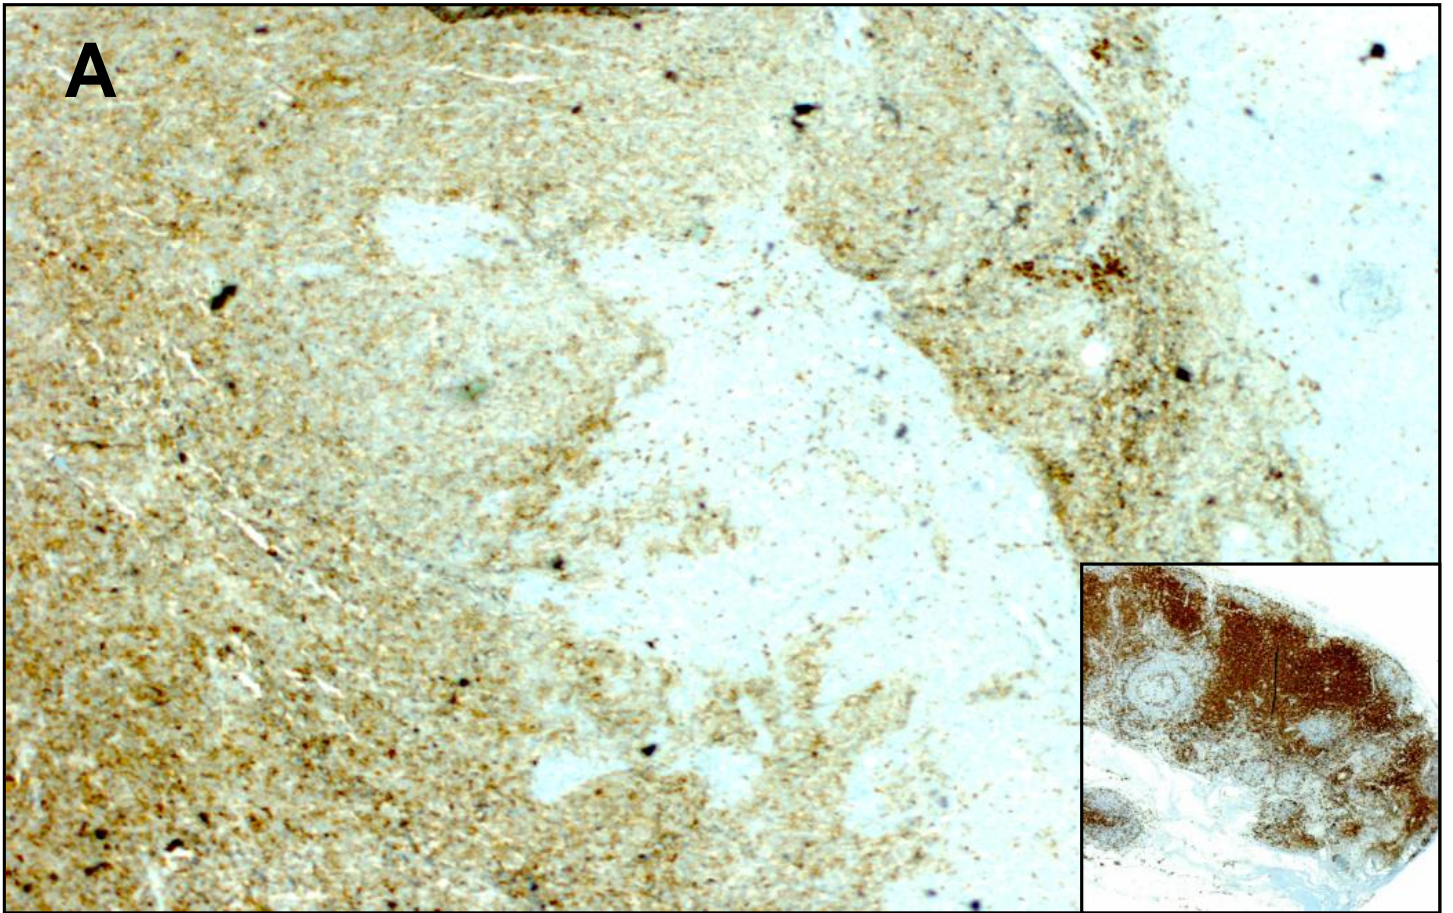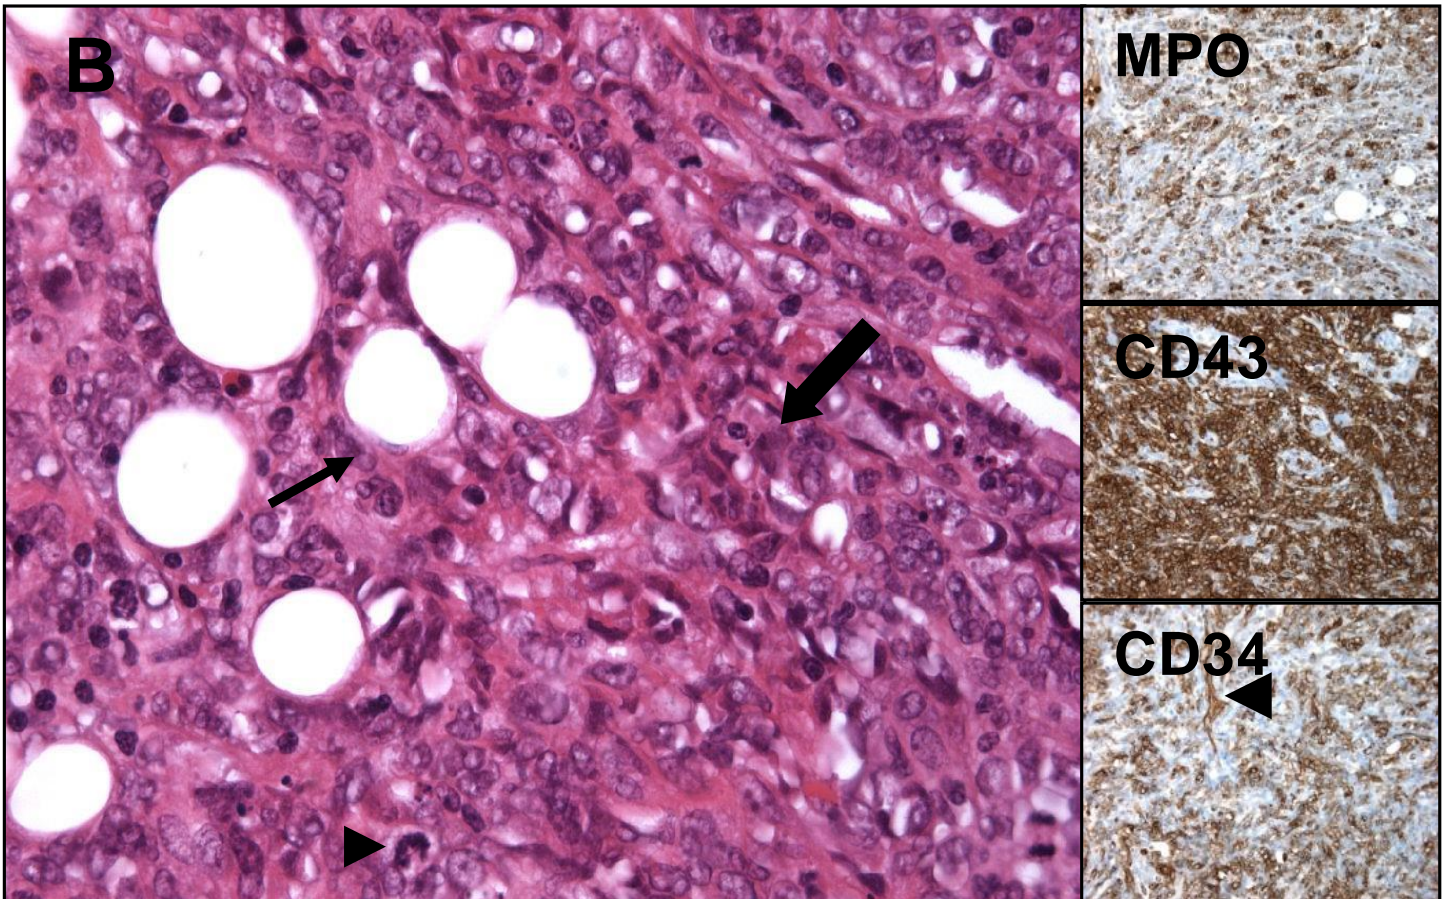

Supplement: MOESM1 [file 9561656]
